# Supplementary material for: Efficient Rice-Husk-Derived Silica Nanocatalysts for Organic Dye Removal from Water
Source: MDPI journal article supplement (doi:10.3390/catal11070815), 2021-07-04
Supplement: s1 [file s1]

Archive with 1 entries (1 files):
- catalysts-1266834-supplementary.pdf
