# Supplementary material for: Efficient Rice-Husk-Derived Silica Nanocatalysts for Organic Dye Removal from Water
Source: MDPI journal article supplement (doi:10.3390/catal11070815), 2021-07-04
Supplement: s1 [file s1 › catalysts-1266834-supplementary.pdf]

**Supplementary material - Efficient rice husk-derived silica nanocatalysts for organic dyes removal from water**

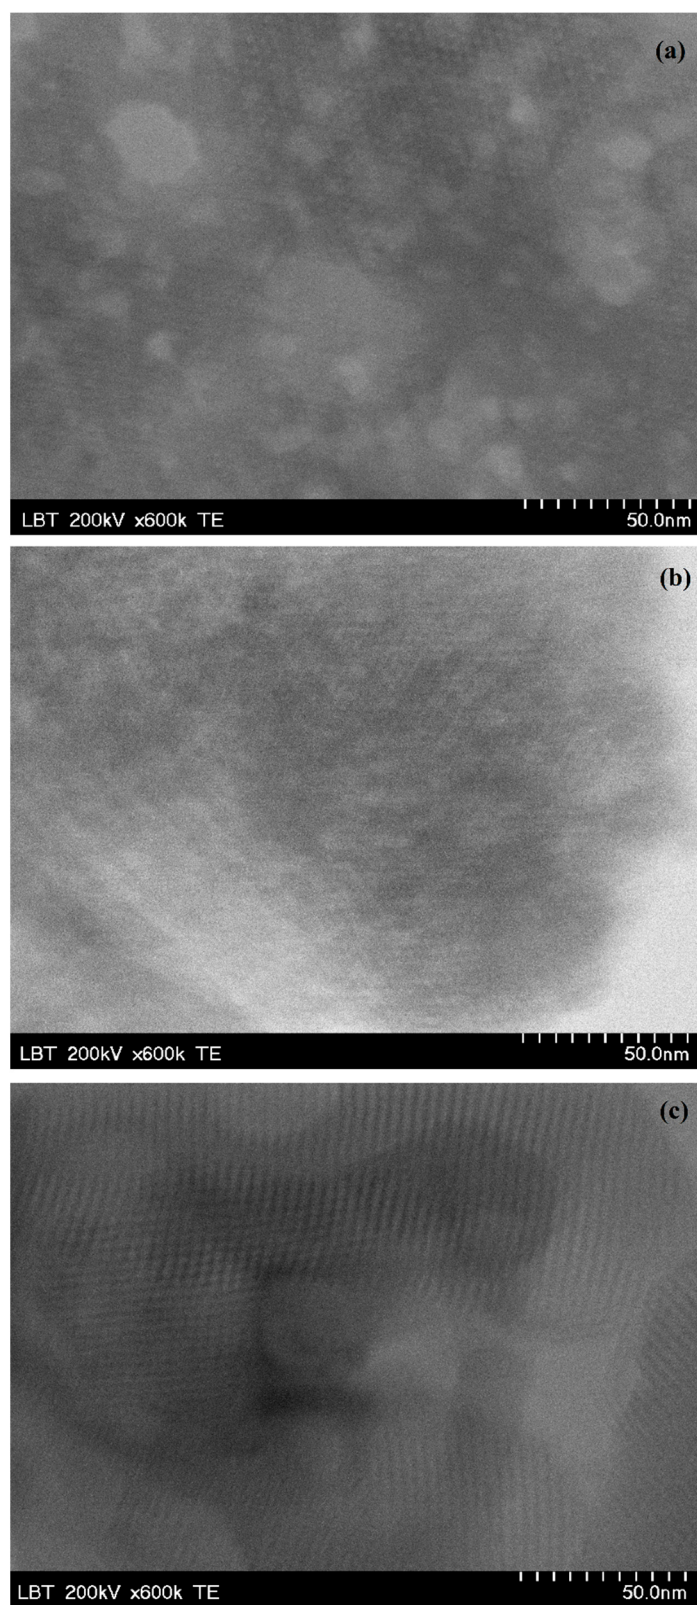

**Figure S1. TEM images for MCM-41<sub>r</sub> (a), Ni-MCM-41<sub>r</sub> (b) and Fe-MCM-41<sub>r</sub> (c)**

**Table S1. Structural properties derived from TEM analysis**

| <b>Sample</b>          | <b>Pore medium diameter (nm)</b> |
|------------------------|----------------------------------|
| MCM-41 <sub>r</sub>    | 3.74                             |
| Ni-MCM-41 <sub>r</sub> | 3.74                             |
| Fe-MCM-41 <sub>r</sub> | 2.81                             |

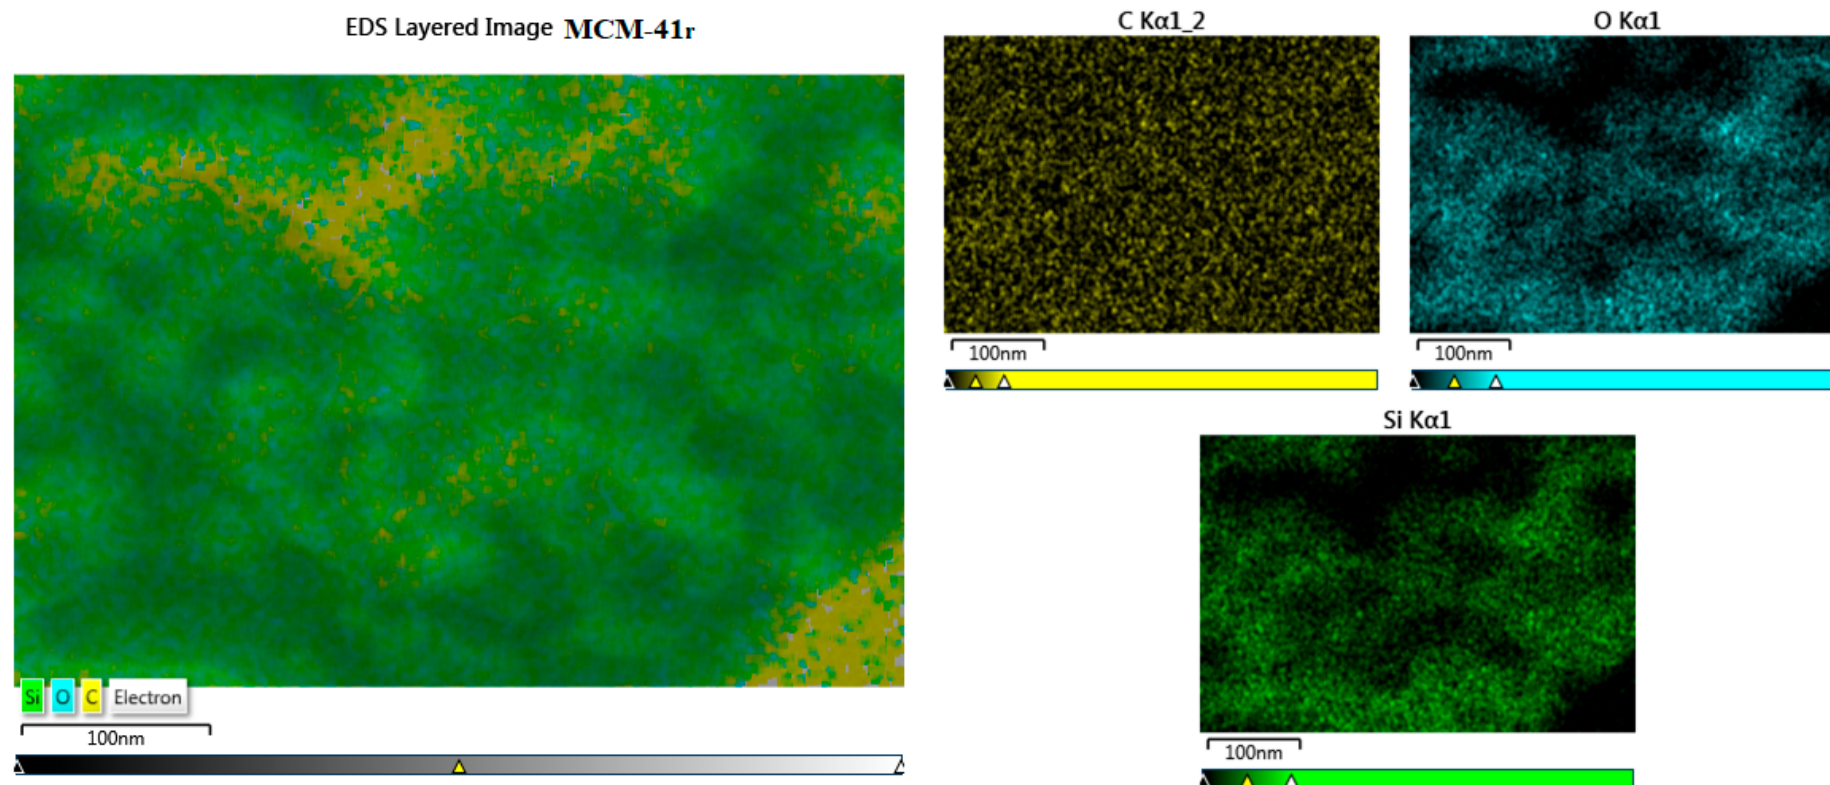

**Figure S2. EDS mapping for MCM-41r**



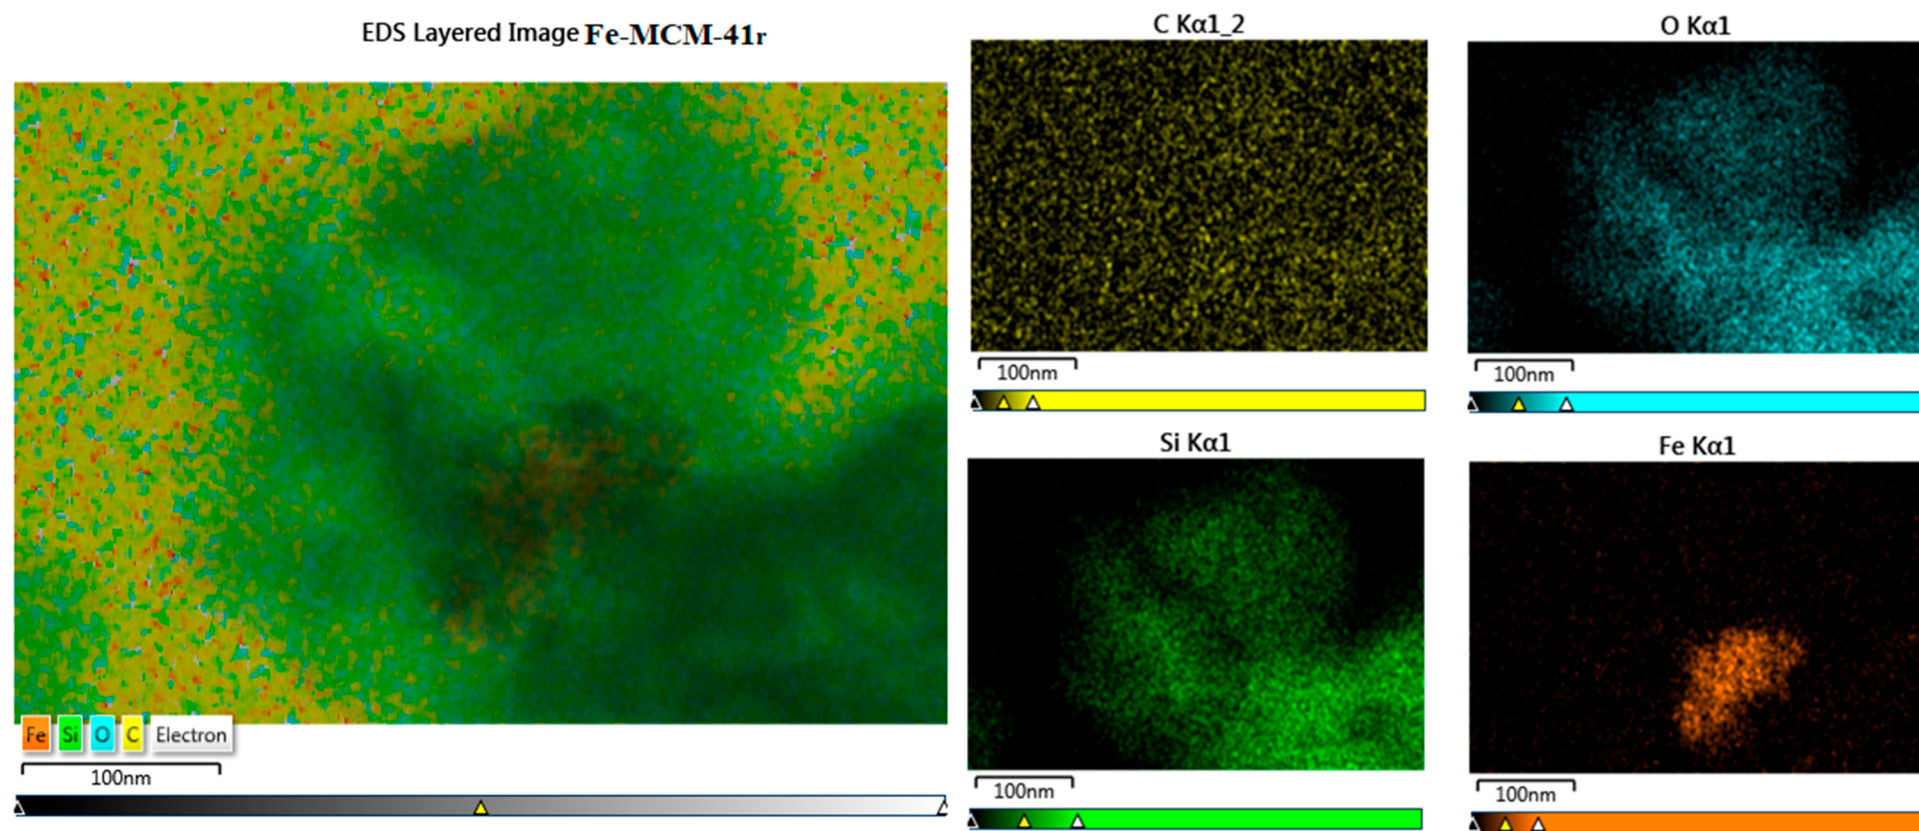

Figure S4. EDS mapping for Fe-MCM-41<sub>r</sub>
